# Supplementary material
Source: publisher figshare collection journal article supplement (https://adisjournals.figshare.com/articles/dataset/_/26862922)

# Reduced Sense of Smell in Patients with Severe Chronic Rhinosinusitis and its Implications for Diagnosis and Management: A Narrative Review

Zachary M. Soler · Scott Nash · Andrew P. Lane · Zara M. Patel · Stella E. Lee · Wytke J. Fokkens · Mark Corbett · Juby A. Jacob-Nara · Harry Sacks

Smell Loss in CRS is a Common Sign of Disease

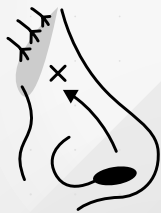

Significant Impact & Burden of Smell Loss

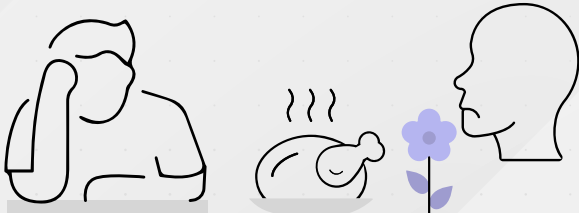

Relationship Between Smell Loss and CRS Disease Severity

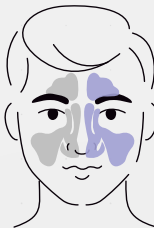

Smell Loss is a Key Element of Current Diagnostic Guidelines

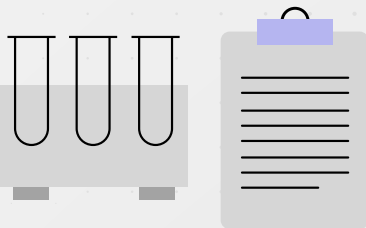

## Treatment of Smell Loss

Efficacy of biologics on reduced sense of smell assessed using UPSIT and on HRQoL assessed using SNOT-22 in phase III clinical trials

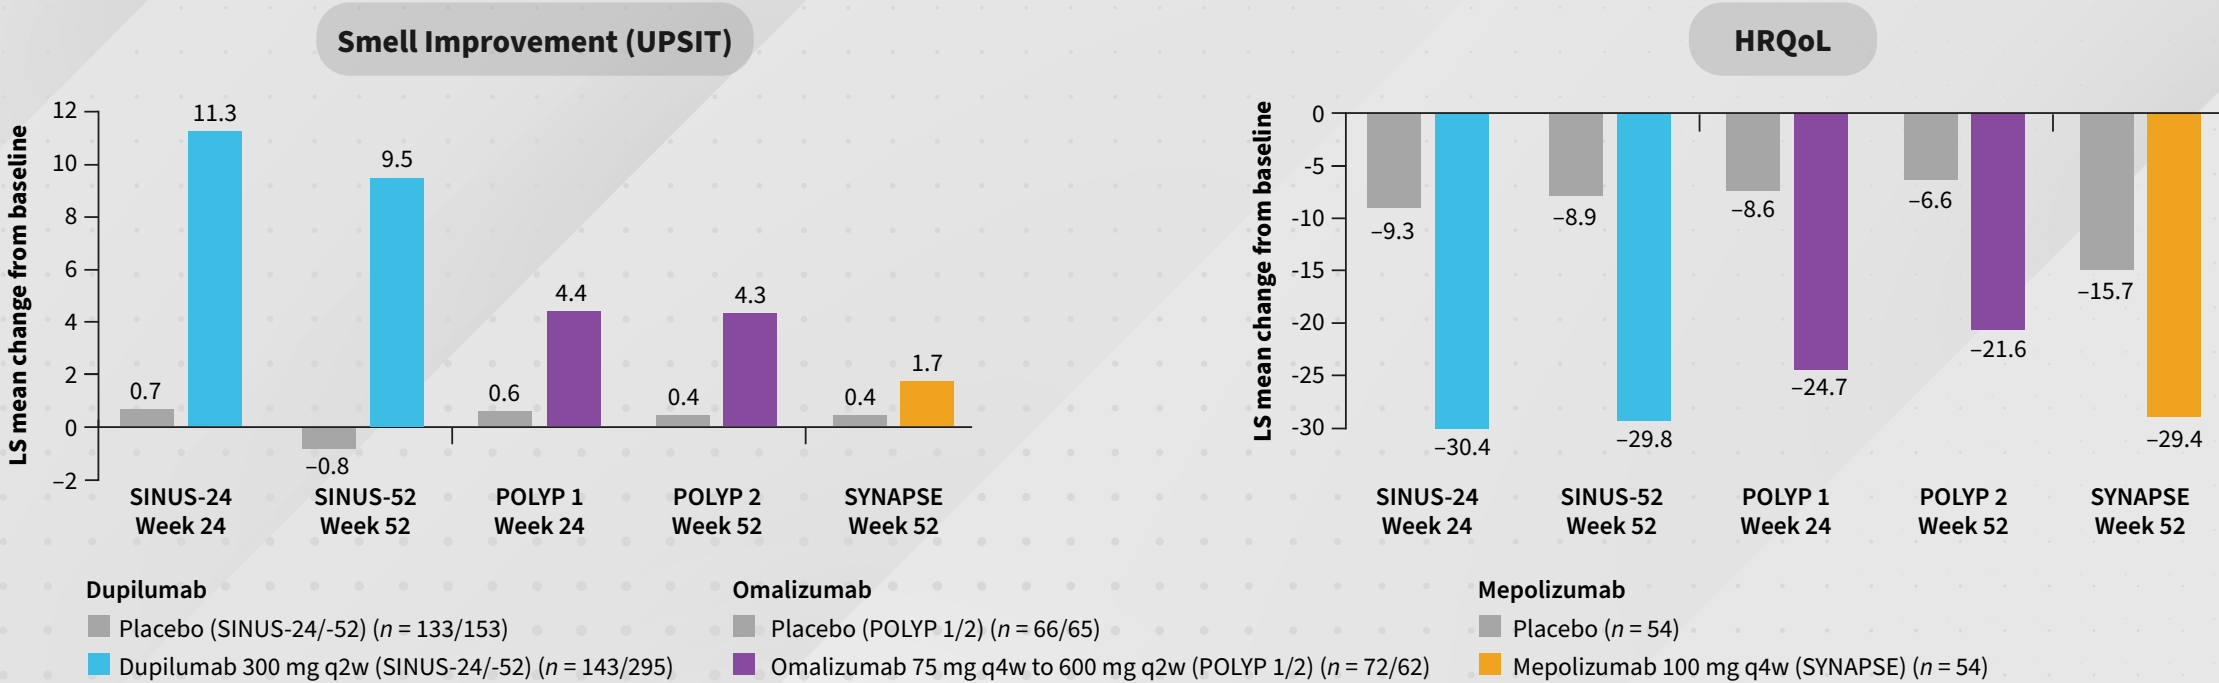

Supplement: Supplementary file 1 [file 1]
